# Supplementary material for: A unique cooperative catalytic system carrying metallic iron and 2-hydroxyethyl 2-bromoisobutyrate for the controlled/living ring-opening polymerization of ε-caprolactone
Source: Royal Society of Chemistry journal article supplement (doi:10.1039/c5ra22279f), 2016-01-01
Supplement: c5ra22279f1.pdf [file c5ra22279f1.pdf]

## Electronic Supplementary Information (ESI)

### **A unique cooperative catalytic system carrying metallic iron and 2-hydroxyethyl 2-bromoisobutyrate for the controlled/living ring-opening polymerization of $\epsilon$ -caprolactone**

Xiu-Juan Shang,<sup>a</sup> Wen-Hua Zhang,<sup>\*a</sup> and Jian-Ping Lang<sup>\*a,b</sup>

<sup>a</sup> *College of Chemistry, Chemical Engineering and Materials Science, Soochow University, Suzhou 215123, People's Republic of China*

<sup>b</sup> *State Key Laboratory of Organometallic Chemistry, Shanghai Institute of Organic Chemistry, Chinese Academy of Sciences, Shanghai 210032, People's Republic of China*

## Contents

**Figure S1.**  $^1\text{H}$  NMR spectrum of poly( $\epsilon$ -caprolactone) (PCL) catalyzed by Fe/2-hydroxyethyl 2-bromoisobutyrate (HEBiB).....S3

**Figure S2.**  $^1\text{H}$  NMR spectra of poly( $\epsilon$ -caprolactone) (PCL) initiated by benzyl alcohol ( $\text{PhCH}_2\text{OH}$ ) and catalyzed by iron powder along with different haloalkanes like 2-bromo-2-methylpropane (BMP), ethyl-2-bromoisobutyrate (EBiB) and 2-hydroxyethyl 2-bromoisobutyrate (HEBiB).....S3

**Table S1.** Polymerization of  $\epsilon$ -caprolactone (CL) by stepwise addition of the reactants.....S4

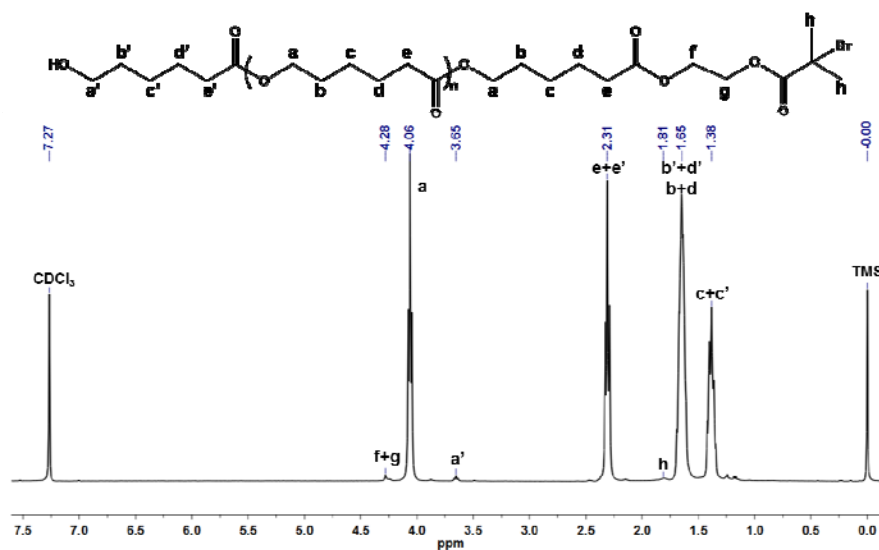

**Figure S1.**  $^1\text{H}$  NMR spectrum of poly( $\epsilon$ -caprolactone) (PCL) catalyzed by Fe/2-hydroxyethyl 2-bromoisobutyrate (HEBiB).

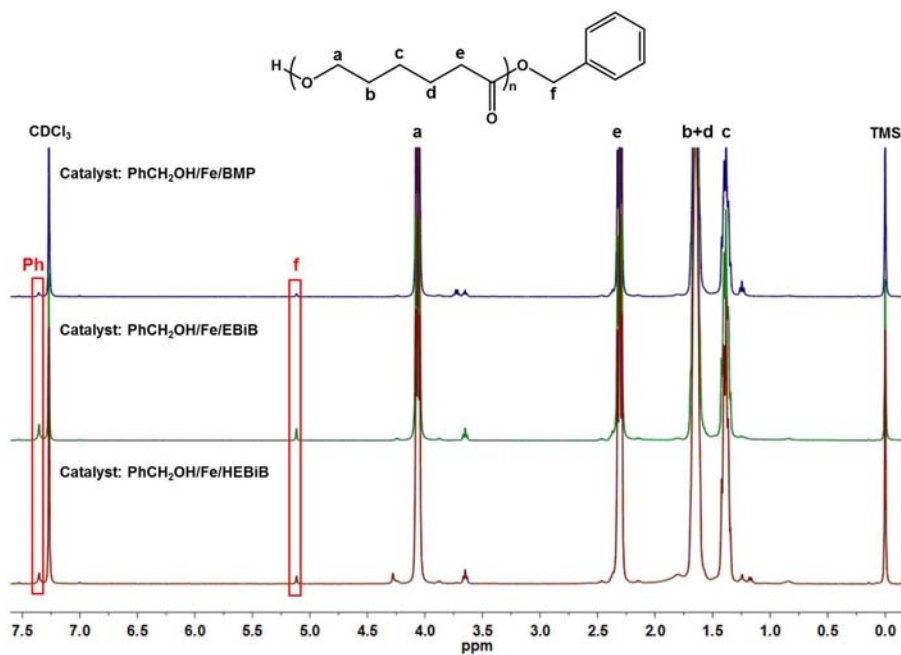

**Figure S2.**  $^1\text{H}$  NMR spectra of poly( $\epsilon$ -caprolactone) (PCL) initiated by benzyl alcohol ( $\text{PhCH}_2\text{OH}$ ) and catalyzed by iron powder along with different haloalkanes like 2-bromo-2-methylpropane (BMP), ethyl-2-bromoisobutyrate (EBiB) and 2-hydroxyethyl 2-bromoisobutyrate (HEBiB).

**Table S1.** Polymerization of  $\epsilon$ -caprolactone (CL) by stepwise addition of the reactants.

| Entry          | $M_n^d$ (g/mol) | $M_{theo}^e$ (g/mol) | PDI <sup>d</sup> | Yield <sup>f</sup> (%) |
|----------------|-----------------|----------------------|------------------|------------------------|
| 1 <sup>a</sup> | 23040           | 22830                | 1.24             | 100                    |
| 2 <sup>b</sup> | 19990           | 22830                | 1.27             | 100                    |
| 3 <sup>c</sup> | 18280           | 22830                | 1.33             | 100                    |

Reaction condition: solvent: toluene; reaction temperature: 110 °C; HEBiB: 2-hydroxyethyl 2-bromoisobutyrate.

<sup>a</sup>  $[Fe]_0:[HEBiB]_0 = 1:1$  was added first and heated for 24 h, then 100 equiv of CL was added and heated for another 24 h. <sup>b</sup>  $[CL]_0:[Fe]_0:[HEBiB]_0 = 1:1:1$  was added first and heated for 24 h, then 99 equiv of CL was added and heated for another 24 h. <sup>c</sup>  $[CL]_0:[Fe]_0:[HEBiB]_0 = 50:1:1$  was added first and heated for 24 h, then 50 equiv of CL was added and heated for another 24 h. <sup>d</sup> Determined by GPC analysis in THF, calibrated to a polystyrene standard. <sup>e</sup>  $M_{theo} = \text{yield} (\%) \times \text{ratio} [CL]_0/[HEBiB]_0 \times 2 \times M (CL)$ . <sup>f</sup> Yield: weight of polymer obtained/weight of monomer used.
